# Supplementary material
Source: publisher site journal article supplement (https://www.dovepress.com/article/340710)
Supplement: Supplementary file 1 [file get_supplementary_file.php]

**Associations with post-consultation health-status in primary care managed acute exacerbation of COPD**

**Supplementary material**

***Description of how continuous variables and missing data were handled***

Continuous variables (age, BMI, days with symptoms, body temperature, pulse rate, and oxygen saturation) were investigated for non-linearity by visual inspection (an x-y scatter plot against CCQ total scores and quantile-quantile plots derived from a model where the variable was included as a linear term) and by refitting models with cubic spline terms (both 3 knots and 5 knots). Models with cubic spline terms were compared to those with a linear term using Akaike’s Information Criterion (AIC) values, with differences in AIC values > 4[1] or concerns following visual inspection prompting the use of non-linear terms or categorisation. Based on visual inspection and AIC values, age, temperature, and pulse rate were included as linear terms in models. Owing to the discontinuous nature of the “days with symptoms” variable (including clear digit-preferences around whole weeks), this variable was categorised into 1 to 6 days; 7 to 13 days; 14+ days. The distribution of oxygen saturation values was skewed by a small number of participants with low oxygen saturation. This was therefore modelled as a binary variable with a cut-off of 92% chosen to align with the upper limit of oxygen saturation levels advised by NICE guidance when administering controlled oxygen therapy.[2] BMI was grouped into four categories (underweight (< 18.5kg/m2); healthy weight (18.5 to 24.9kg/m2); overweight (25 to 29.9kg/m2); obese (≥30kg/m2)).

Missing observations were handled using multiple imputation. Specifically, we used single-level fully conditional specification (through the mi impute chained command in Stata), (White, Royston, Wood, 2011) arranging repeated measurements within individuals in wide format and including practices as dummy indicators. This approach has been shown to preserve the type of clustering inherent in this dataset and produce valid inferences.[3] Binary variables and ordered categorical variables were imputed preserving their structure, with augmented-regression used to handle perfect prediction.[4] Fifty imputed datasets were created.[5] See Box S1 for more details.

*References for statistical methods*

1. Burnham KP, Anderson DR. Multimodel inference: Understanding AIC and BIC in model selection. *Sociol. Methods Res.* 2004; 33: 261–304.

2. National Institute for Health and Care Excellence. Oxygen [Internet]. [cited 2021 Apr 21].Available from: https://bnf.nice.org.uk/treatment-summary/oxygen.html.

3. Wijesuriya R, Moreno-Betancur M, Carlin JB, Lee KJ. Evaluation of approaches for multiple imputation of three-level data. *BMC Med. Res. Methodol.* BMC Medical Research Methodology; 2020; 20: 1–15.

4. White IR, Daniel R, Royston P. Avoiding bias due to perfect prediction in multiple imputation of incomplete categorical variables. *Comput. Stat. Data Anal.* [Internet] 2010; 54: 2267–2275Available from: https://www.sciencedirect.com/science/article/pii/S0167947310001490.

5. White IR, Royston P, Wood AM. Multiple imputation using chained equations: Issues and guidance for practice. *Stat. Med.* [Internet] John Wiley & Sons, Ltd; 2011; 30: 377–399Available from: https://doi.org/10.1002/sim.4067.

***Description of multiple imputation approach***

Missing observations were handled using multiple imputation. Specifically, we used single-level fully conditional specification (through the mi impute chained command in Stata), (White, Royston, Wood, 2011) arranging repeated measured within individuals in wide format and including practices as dummy indicators. This approach has been shown to preserve the type of clustering inherent in this dataset and produce valid inferences. (Wijesuriya et al, 2020) Binary variables and ordered categorical variables were imputed preserving their structure, with augmented-regression used to handle perfect prediction. (White, Daniel, Royston, 2010) Fifty imputed datasets were created (White et al, 2011).

**Box S1:** Stata code used to impute missing observations

*Check the number of missing observations for each variable of interest

*First reshape the data to wide format

reshape wide CCQ_TOTAL, i(Participant) j(Index1)

*Specify the imputation model - using chained equations

mi set wide

mi register imputed CCQ_TOTAL1 CCQ_TOTAL2 CCQ_TOTAL3 CCQ_TOTAL_BASELINE antipres_00 orlcpres_00 BMI_CAT EVERSMOKE oralant12_06 PERCPRED_FEV1 SPUTUM_COLOUR dmvessnd_00 tachypn_00 temp_00 pulserate_00 OXSAT_CAT

mi impute chained (regress) CCQ_TOTAL1 CCQ_TOTAL2 CCQ_TOTAL3 CCQ_TOTAL_BASELINE PERCPRED_FEV1 temp_00 pulserate_00 (logit, augment) antipres_00 orlcpres_00 EVERSMOKE oralant12_06 dmvessnd_00 tachypn_00 OXSAT_CAT (ologit, augment) SPUTUM_COLOUR BMI_CAT = i.SiteID i.randoarm_00 AGE i.GENDER hrtfail_00 chrtdis_00 diabmel_00 chrkidny_00 hyperten_00 i.SEASON i.dayscopd_cat i.randfeat1_00 i.randfeat2_00 i.randfeat3_00 i.crackles_00 i.wheezes_00, add(50) noisily

*Rehsape back to long format

mi reshape long CCQ_TOTAL, i(Participant) j(Index1)

**Table S1a:** Multivariable models (Blocks 1 to 3)*

| **Variable** | | **Block 1** | | **Block 2** | | **Block 3** | |
| --- | --- | --- | --- | --- | --- | --- | --- |
| **AMD** | **95% CI** | **AMD** | **95% CI** | **AMD** | **95% CI** |
| Age (per decade increase) | | 0.02 | -0.06 to 0.09 | -0.02 | -0.10 to 0.06 | -0.02 | -0.10 to 0.06 |
| Participant sex | Male | Reference category | | Reference category | | Reference category | |
| Female | -0.13 | -0.27 to 0.02 | -0.11 | -0.26 to 0.03 | -0.12 | -0.26 to 0.03 |
| Body Mass Index category | Underweight | 0.36 | -0.02 to 0.74 | 0.29 | -0.09 to 0.67 | 0.30 | -0.07 to 0.68 |
| Healthy weight | Reference category | | Reference category | | Reference category | |
| Overweight | 0.09 | -0.09 to 0.27 | 0.08 | -0.10 to 0.26 | 0.08 | -0.11 to 0.26 |
| Obese | 0.25 | 0.07 to 0.43 | 0.21 | 0.02 to 0.40 | 0.22 | 0.03 to 0.40 |
| Smoking status | Never smoked | Reference category | | Reference category | | Reference category | |
| Ever smoked | 0.14 | -0.15 to 0.42 | 0.11 | -0.18 to 0.40 | 0.11 | -0.18 to 0.40 |
| Heart failure | |  |  | 0.09 | -0.25 to 0.42 | 0.08 | -0.25 to 0.41 |
| Chronic heart disease | |  |  | 0.02 | -0.17 to 0.22 | 0.03 | -0.16 to 0.22 |
| Diabetes | |  |  | 0.14 | -0.05 to 0.34 | 0.15 | -0.05 to 0.34 |
| Chronic kidney disease | |  |  | 0.18 | -0.07 to 0.43 | 0.15 | -0.10 to 0.40 |
| Hypertension | |  |  | 0.02 | -0.13 to 0.17 | 0.02 | -0.13 to 0.18 |
| Patient has been prescribed oral antibiotics in the past 12 months for any reason | |  |  | 0.24 | 0.09 to 0.39 | 0.25 | 0.10 to 0.40 |
| Percent predicted FEV1 (per 10-point increase) | |  |  | -0.03 | -0.07 to 0.00 | -0.03 | -0.07 to 0.01 |
| Season of presentation | Winter |  |  |  |  | Reference category | |
| Spring |  |  |  |  | 0.03 | -0.17 to 0.23 |
| Summer |  |  |  |  | -0.03 | -0.31 to 0.25 |
| Autumn |  |  |  |  | -0.12 | -0.30 to 0.05 |
| Number of days with exacerbation prior to consulting | 1 to 6 days |  |  |  |  | Reference category | |
| 7 to 13 days |  |  |  |  | -0.00 | -0.16 to 0.16 |
| 14+ days |  |  |  |  | 0.08 | -0.11 to 0.27 |
| Increased breathlessness | |  |  |  |  | 0.15 | -0.10 to 0.39 |
| Increase sputum volume | |  |  |  |  | -0.03 | -0.20 to 0.14 |
| Increased sputum purulence | |  |  |  |  | 0.13 | -0.03 to 0.29 |

*Block 1 = sociodemographic features (marginal r2 = 0.621); Block 2 = sociodemographic and past medical history features (marginal r2 = 0.661); Block 3 = sociodemographic, past medical history, and initial presenting features (marginal r2 = 0.668). All models correct for the clustered nature of repeated observations within individuals within practices (1,947 observations within 649 individuals within 86 practices). All models are adjusted for trial arm, CCQ total score at the index consultation, antibiotic prescribing at the index consultation, and oral corticosteroid prescribing at the index consultation (marginal r2 for this initial model = 0.594).

**Table S1b** Multivariable models (Blocks 4 to 6)*

| **Variable** | | **Block 4** | | **Block 5** | | **Block 6** | |
| --- | --- | --- | --- | --- | --- | --- | --- |
| **AMD** | **95% CI** | **AMD** | **95% CI** | **AMD** | **95% CI** |
| Age (per decade increase) | | -0.02 | -0.10 to 0.06 | -0.02 | -0.10 to 0.06 | -0.02 | -0.10 to 0.06 |
| Participant sex | Male | Reference category | | Reference category | | Reference category | |
| Female | -0.12 | -0.26 to 0.03 | -0.12 | -0.26 to 0.02 | -0.13 | -0.27 to 0.02 |
| Body Mass Index category | Underweight | 0.31 | -0.07 to 0.68 | 0.30 | -0.07 to 0.68 | 0.26 | -0.12 to 0.64 |
| Healthy weight | Reference category | | Reference category | | Reference category | |
| Overweight | 0.07 | -0.11 to 0.26 | 0.08 | -0.10 to 0.26 | 0.09 | -0.10 to 0.27 |
| Obese | 0.22 | 0.03 to 0.41 | 0.22 | 0.03 to 0.41 | 0.24 | 0.05 to 0.42 |
| Smoking status | Never smoked | Reference category | | Reference category | | Reference category | |
| Ever smoked | 0.12 | -0.17 to 0.41 | 0.12 | -0.17 to 0.41 | 0.12 | -0.16 to 0.41 |
| Heart failure | | 0.07 | -0.26 to 0.40 | 0.04 | -0.29 to 0.37 | 0.04 | -0.29 to 0.37 |
| Chronic heart disease | | 0.03 | -0.16 to 0.22 | 0.04 | -0.15 to 0.23 | 0.06 | -0.13 to 0.25 |
| Diabetes | | 0.15 | -0.05 to 0.34 | 0.16 | -0.04 to 0.36 | 0.12 | -0.08 to 0.32 |
| Chronic kidney disease | | 0.14 | -0.11 to 0.40 | 0.15 | -0.10 to 0.41 | 0.18 | -0.08 to 0.43 |
| Hypertension | | 0.02 | -0.13 to 0.17 | 0.02 | -0.14 to 0.17 | 0.02 | -0.13 to 0.17 |
| Patient has been prescribed oral antibiotics in the past 12 months for any reason | | 0.24 | 0.10 to 0.39 | 0.26 | 0.11 to 0.40 | 0.25 | 0.10 to 0.40 |
| Percent predicted FEV1 (per 10-point increase) | | -0.03 | -0.07 to 0.01 | -0.03 | -0.07 to 0.01 | -0.03 | -0.07 to 0.01 |
| Season of presentation | Winter | Reference category | | Reference category | | Reference category | |
| Spring | 0.03 | -0.17 to 0.23 | 0.03 | -0.17 to 0.23 | 0.03 | -0.16 to 0.23 |
| Summer | -0.03 | -0.31 to 0.25 | -0.01 | -0.29 to 0.27 | -0.00 | -0.28 to 0.27 |
| Autumn | -0.12 | -0.30 to 0.05 | -0.12 | -0.29 to 0.05 | -0.13 | -0.30 to 0.05 |
| Number of days with exacerbation prior to consulting | 1 to 6 days | Reference category | | Reference category | | Reference category | |
| 7 to 13 days | -0.00 | -0.17 to 0.16 | -0.01 | -0.17 to 0.16 | -0.00 | -0.16 to 0.16 |
| 14+ days | 0.08 | -0.11 to 0.27 | 0.07 | -0.13 to 0.26 | 0.06 | -0.13 to 0.25 |
| Increased breathlessness | | 0.15 | -0.10 to 0.39 | 0.16 | -0.08 to 0.41 | 0.16 | -0.09 to 0.40 |
| Increase sputum volume | | -0.02 | -0.19 to 0.15 | -0.03 | -0.20 to 0.14 | -0.02 | -0.19 to 0.15 |
| Increased sputum purulence | | 0.11 | -0.07 to 0.29 | 0.11 | -0.07 to 0.29 | 0.13 | -0.05 to 0.31 |
| Sputum colour | Sputum colour 1 | Reference category | | Reference category | | Reference category | |
| Sputum colour 2 | -0.04 | -0.24 to 0.17 | -0.05 | -0.26 to 0.15 | -0.06 | -0.26 to 0.15 |
| Sputum colour 3 | 0.08 | -0.14 to 0.30 | 0.09 | -0.13 to 0.31 | 0.08 | -0.13 to 0.30 |
| Sputum colour 4 | 0.00 | -0.22 to 0.23 | 0.01 | -0.21 to 0.24 | -0.00 | -0.23 to 0.22 |
| Sputum colour 5 | 0.07 | -0.25 to 0.39 | 0.09 | -0.23 to 0.41 | 0.07 | -0.25 to 0.40 |
| Crackles | |  |  | -0.06 | -0.21 to 0.10 | -0.05 | -0.20 to 0.11 |
| Wheeze | |  |  | -0.14 | -0.30 to 0.02 | -0.14 | -0.30 to 0.02 |
| Diminished vesicular breathing | |  |  | -0.13 | -0.31 to 0.04 | -0.13 | -0.30 to 0.04 |
| Patient is tachypnoeic | |  |  |  |  | 0.06 | -0.15 to 0.28 |
| Temperature (per degree increase) | |  |  |  |  | -0.17 | -0.30 to -0.03 |
| Pulse rate (per one bpm increase) | |  |  |  |  | 0.01 | 0.00 to 0.01 |
| Oxygen saturation | Normal (> 92%) |  |  |  |  | Reference category | |
| Low (up to 92%) |  |  |  |  | 0.08 | -0.16 to 0.32 |

*Block 4 = sociodemographic features, past medical history, initial presentation, and sputum colour (marginal r2 = 0.671); Block 5 = sociodemographic features, past medical history, initial presentation, sputum colour, and presence of chest sounds (marginal r2 = 0.693); Block 6 = sociodemographic features, past medical history, initial presentation, sputum colour, presence of chest sounds, and other clinical examinations (marginal r2 = 0.718). All models correct for the clustered nature of repeated observations within individuals within practices (1,947 observations within 649 individuals within 86 practices). All models are adjusted for trial arm, CCQ total score at the index consultation, antibiotic prescribing at the index consultation, and oral corticosteroid prescribing at the index consultation (marginal r2 for this initial model = 0.594).

**Figure S1:** Predicted CCQ total scores over the four-weeks post-consultation across the range of temperatures recorded during the study*

*Black line and grey area denotes adjusted mean CCQ total score over the four weeks following the index consultation. Prediction is adjusted for sociodemographic features, clinical history, initial presentation, sputum colour, presence of chest sounds, and other clinical examinations. Predictions are also adjusted for the clustered nature of repeated observations within individuals within practices and trial arm, CCQ total score at the index consultation, antibiotic prescribing at the index consultation, and oral corticosteroid prescribing at the index consultation. The hollow circles denote the observed CCQ total scores. The grey horizontal dashed line denotes the value which is 0.4 points lower than the predicted CCQ total score when a participant’s temperature was 35.2 degrees Celsius. The red vertical dashed lines denote the boundaries on what is considered a normal temperature range (36.1 to 37.2 degrees Celsius).

**Figure S2:** Predicted CCQ total scores over the four-weeks post-consultation across the range of pulse rates recorded during the study*

*Black line and grey area denotes adjusted mean CCQ total score over the four weeks following the index consultation. Prediction is adjusted for sociodemographic features, clinical history, initial presentation, sputum colour, presence of chest sounds, and other clinical examinations. Predictions are also adjusted for the clustered nature of repeated observations within individuals within practices and trial arm, CCQ total score at the index consultation, antibiotic prescribing at the index consultation, and oral corticosteroid prescribing at the index consultation. The hollow circles denote the observed CCQ total scores. The grey horizontal dashed line denotes the value which is 0.4 points higher than the predicted CCQ total score when a participant’s pulse rate was 50 beats per minute.
